# Supplementary material for: Structural diversities and magnetic properties of azide-containing coordination polymers based on flexible tetra-pyridinate ligands
Source: Royal Society of Chemistry journal article supplement (doi:10.1039/c4ce02252a), 2015-01-01
Supplement: c4ce02252a1.pdf [file c4ce02252a1.pdf]

# Structural diversities and magnetic properties of azide-containing coordination polymers based on flexible tetra-pyridinate ligands

Fan Yu,<sup>a,\*</sup> Mi Xiang,<sup>a</sup> Ai-hua Li,<sup>a</sup> Yu-min Zhang,<sup>a</sup> Bao Li<sup>b,\*</sup>

<sup>a</sup> Key Laboratory of Optoelectronic Chemical Materials and Devices of Ministry of Education, School of Chemical and Environmental Engineering, Jiangnan University, Wuhan 430056, PR China

<sup>b</sup> School of Chemistry and Chemical Engineering, Huazhong University of Science and Technology, Wuhan, Hubei 430074, PR China

## Experimental sections

**Materials and General Methods.** All starting materials were obtained commercially and were used without further purification. Elemental analyses for C, H, N were performed on a Perkin-Elmer 240Q elemental analyzer. The IR spectra were recorded in range of 400-4000 cm<sup>-1</sup> on a Nicolet 5DX spectrometer (KBr pellets). The ligand TPOM and TPOM2 were synthesized by a literature method.<sup>1</sup> Magnetic susceptibility measurements were carried out in the temperature range of 2–300 K with a magnetic field of 1000 Oe on Quantum Design MPMS XL-7 magnetometer. The low temperature heat capacity had been measured by PPMS.

**Synthesis of [Mn<sub>3</sub>(TPOM)<sub>3</sub>(N<sub>3</sub>)<sub>6</sub>(H<sub>2</sub>O)<sub>6</sub>]<sub>n</sub> (1).** A mixture of NaN<sub>3</sub> (0.2 mmol), Mn(NO<sub>3</sub>)<sub>2</sub>·4H<sub>2</sub>O (0.2 mmol) and TPOM (5.5mg, 0.025 mmol) was dissolved in 8 mL of CH<sub>3</sub>OH and H<sub>2</sub>O with the ratio of 1:1 in a vessel. The mixture was stirred at room temperature for 30 min, and then heated at 80 °C for 6 hour. The final mixture was stand at room temperature for two day, and Large bulk colorless crystals were obtained from the filtrate. Yield of the reaction was ca. 25% based on TPOM. Anal. Calcd for C<sub>75</sub>H<sub>84</sub>Mn<sub>3</sub>N<sub>30</sub>O<sub>18</sub>: H 4.56%, C 48.47%, N 22.61%; found H 4.12%, C 47.96%, N 22.22%. IR (KBr, cm<sup>-1</sup>): 3467, 2056, 1601, 1571, 1488, 1435, 1277, 1249, 1101, 1002, 754.

**Synthesis of [Ni(TPOM)(N<sub>3</sub>)<sub>2</sub>]<sub>n</sub> (2).** A mixture of NaN<sub>3</sub> (0.2 mmol), Ni(NO<sub>3</sub>)<sub>2</sub>·6H<sub>2</sub>O (0.1 mmol) and TPOM (5.5mg, 0.025 mmol) was dissolved in 8 mL of CH<sub>3</sub>OH and H<sub>2</sub>O with the ratio of 1:1, and was stirred at room temperature for 30 min. The final mixture was placed in a Parr Teflon-lined stainless steel vessel (25mL) under autogenous pressure and heated at 110 °C for 2 days. Block-like crystals were obtained, and crystals were filtered off, washed with mother liquid, and dried under ambient conditions. Yield of the reaction was ca. 45% based on TPOM. Anal. Calcd for C<sub>25</sub>H<sub>24</sub>Ni<sub>2</sub>N<sub>16</sub>O<sub>4</sub>: H 3.31 %, C 41.14%, N 30.7% ; found H 4.01 %, C 40.76%, N 30.23%. IR (KBr, cm<sup>-1</sup>): 3436, 2059, 1608, 1506, 1419, 1303, 1203, 1025, 817.

**Synthesis of [Mn(TPOM2)<sub>2</sub>(N<sub>3</sub>)<sub>2</sub>(H<sub>2</sub>O)<sub>3</sub>(CH<sub>3</sub>OH)<sub>4</sub>]<sub>n</sub> (3).** The synthesis process is very similar to **1** except for TPOM2. Yield of the reaction was ca. 30% based on TPOM2. Anal. Calcd for dyhydrated C<sub>51</sub>H<sub>58</sub>MnN<sub>14</sub>O<sub>12</sub>: H 5.25%, C 54.99%, N 17.60%; found H 5.85%, C 54.11%, N 17.99%. IR (KBr, cm<sup>-1</sup>): 3462, 2057, 1608, 1573, 1486, 1431, 1272, 1243, 1100, 1003, 756.

**Synthesis of [Co(TPOM2)(N<sub>3</sub>)<sub>2</sub>]<sub>n</sub> (4).** The synthesis process is very similar to **2** except for Co(NO<sub>3</sub>)<sub>2</sub>·6H<sub>2</sub>O and TPOM2. Yield of the reaction was ca. 35% based on TPOM2. Anal. Calcd for C<sub>25</sub>H<sub>24</sub>Co<sub>2</sub>N<sub>16</sub>O<sub>4</sub>: H 3.31%, C 41.11%, N 30.68%; found H 3.91%, C 41.02%, N 29.72%. IR (KBr, cm<sup>-1</sup>): 3440, 2064, 1602, 1573, 1481, 1434, 1302, 1155, 1101, 1012, 756.

**X-Ray Structural Determination.** X-ray diffraction data of **1** (0.3 × 0.2 × 0.2 mm), **2** (0.1 × 0.1 × 0.05 mm), **3** (0.3 × 0.2 × 0.2 mm) and **4** (0.3 × 0.25 × 0.20 mm) were collected on Oxford Gemini S Ultra diffractometer using Mo-K $\alpha$  ( $\lambda$  = 0.71073 Å) radiation at room temperature, excepted for **4** with Cu radiation at room temperature. The structures of complexes were solved by direct methods, and the non-hydrogen atoms were located from the trial structure and then refined anisotropically with SHELXTL using a full-matrix leastsquares procedure based on  $F^2$  values.<sup>2</sup> The hydrogen atom positions were fixed geometrically at calculated distances and allowed to ride on the parent atoms. The method of *SQUEEZE* in *PLATON* was carried out in the final crystal resolutions for **3** and **4**.<sup>3</sup> The cavity in **4** should be occupied by

methanol and water molecules. CCDC-994432 (1), CCDC-994433 (2) , CCDC-994434 (3) and CCDC-994435 (4) contain the supplementary crystallographic data for this paper. These data can be obtained free of charge from The Cambridge Crystallographic Data Centre.

**Reference:**

- (1) Ryan, P. E.; Lescop, C.; Laliberté, D.; Hamilton, T.; Maris, T.; Wuest, J. D. *Inorg. Chem.* **2009**, *48*, 2793.
- (2) (a) Altomare, A.; Burla, M. C.; Camalli, M.; Cascarano, G. L.; Giacovazzo, C.; Guagliardi, A.; Moliterni, A. G. G.; Polidori, G.; Spagna, R. *J. Appl. Crystallogr.* **1999**, *32*, b115-119; b) G. M. Sheldrick, *SHELXL-97; Program for refinement of crystal structures*. University of Göttingen, Göttingen, Germany, **1997**.
- (3) A. L. Spek, PLATON, Utrecht University, Utrecht, The Netherlands, 1998.

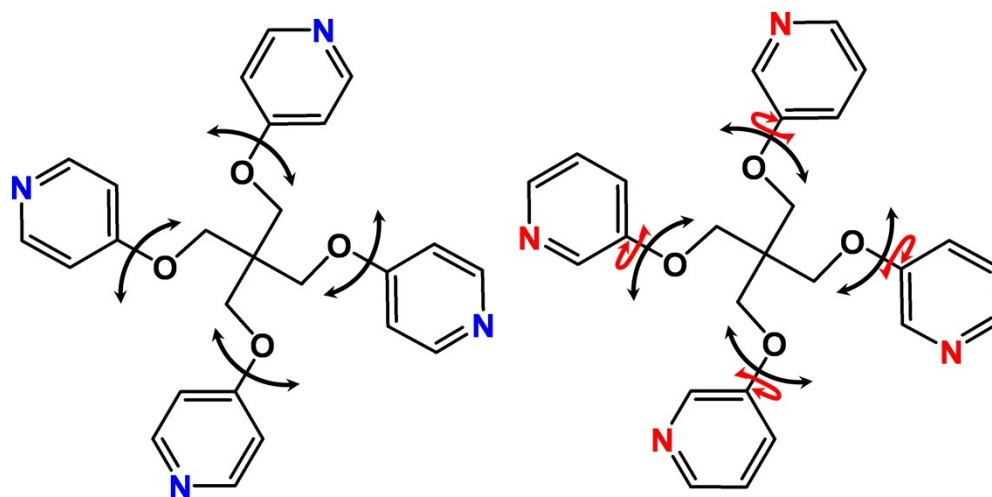

**Scheme S1.** the illustration of the flexibilities of TPOM and TPOM2.

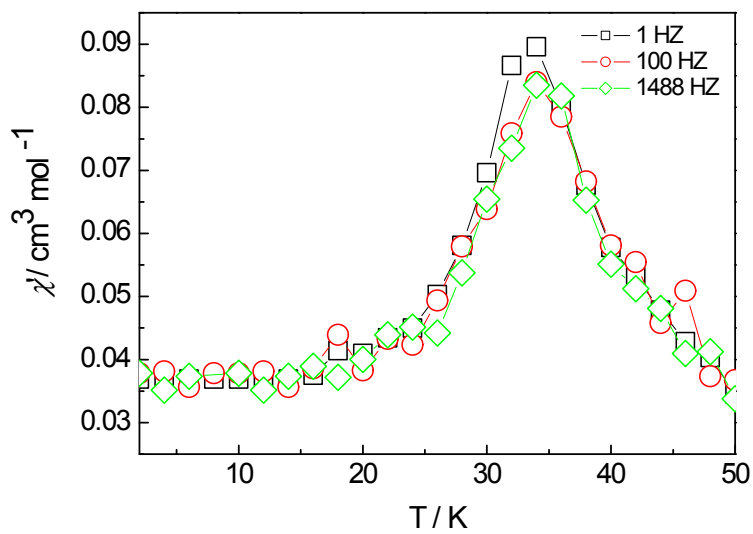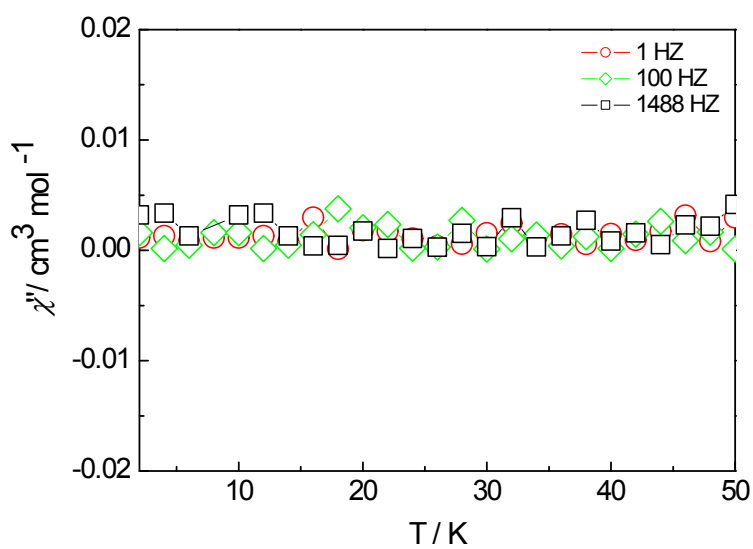

Figure S1. the in-phase and out-of-phase ac susceptibility for 2 in zero dc and 3 Oe ac applied field.

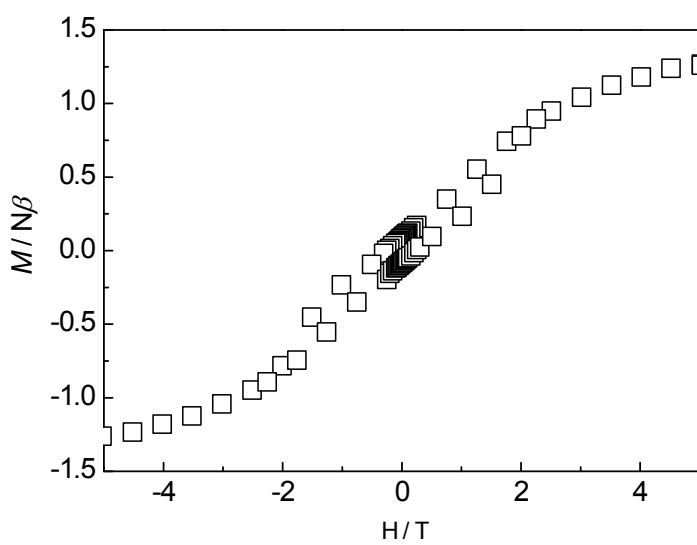

Figure S2. The hysteresis of **2** at 2.0 K.

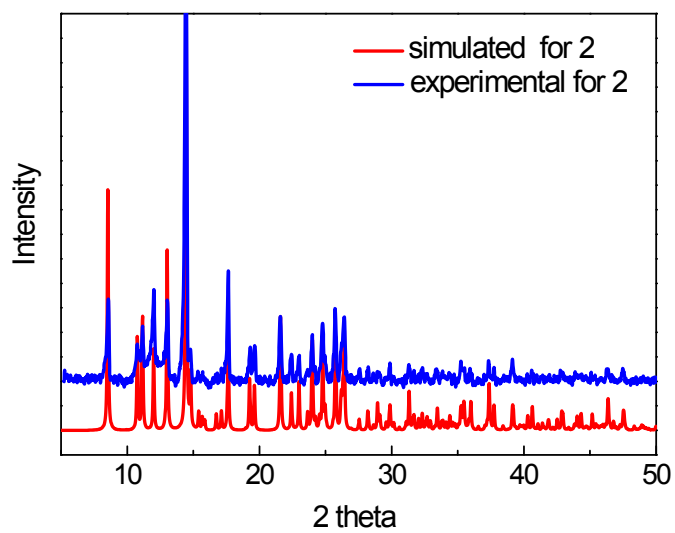

Figure S3. XRD spectra for **2**

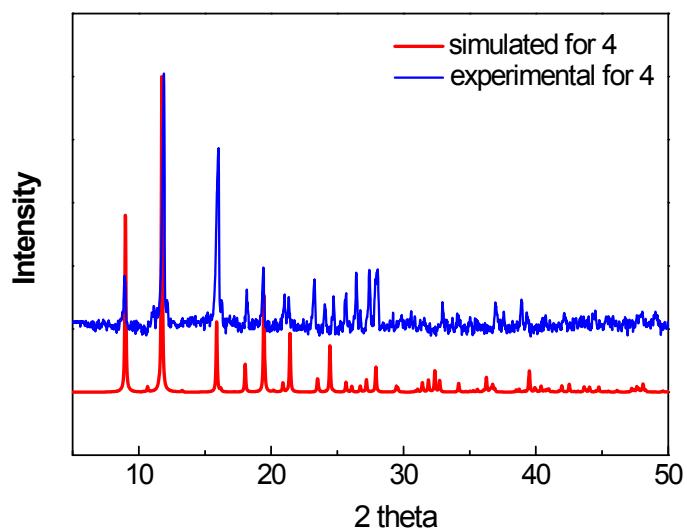

Figure S4. XRD spectra for 4

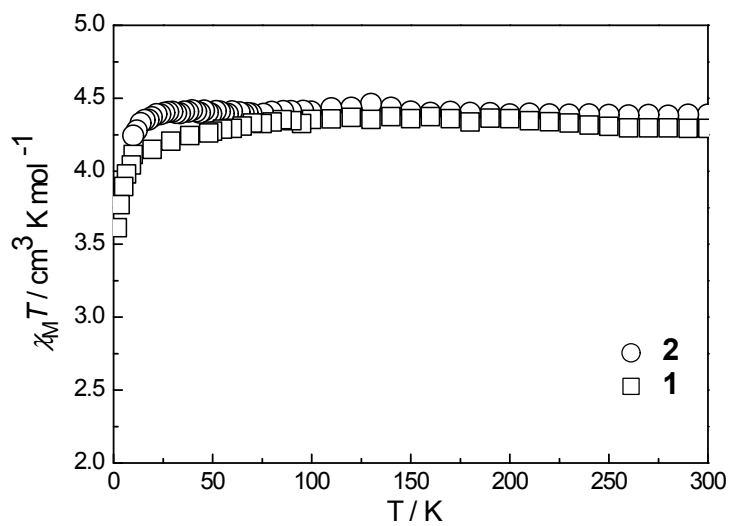

Figure S5.  $\chi_M T$  and  $\chi_M$  versus T plots of **2** in the temperature range of 2-300 K under 1 kOe.

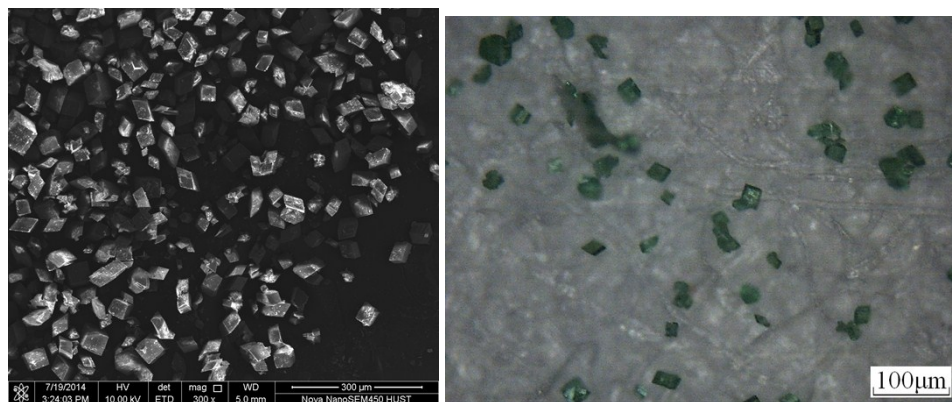

Figure S6. SEM and color-photo for **2**.

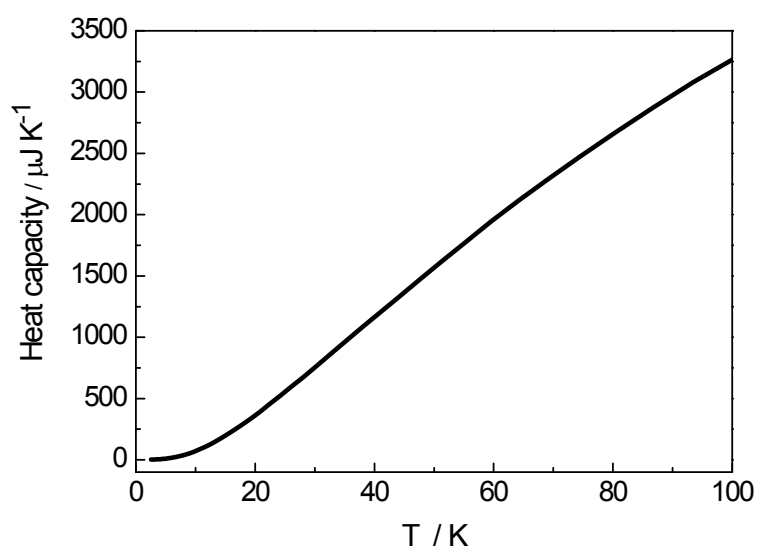

Figure S7. the low temperature heat capacity of 2 by utilizing the PPMS.
